# Supplementary material for: Flooded by jargon: how the interpretation of water-related terms differs between hydrology experts and the general audience
Source: Copernicus journal article supplement (doi:10.5194/hess-2018-297), 2018-06-25
Supplement: Supplementary file [file hess-2018-297-RC2-supplement.pdf]

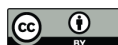

1   **Title**

2   Flooded by jargon: how the interpretation of water-related terms differs  
3   between hydrology experts and the general audience

4  
5   **Authors**

6   Gemma J. Venhuizen<sup>1</sup>, Rolf Hut<sup>2</sup>, Casper Albers<sup>3</sup>, Cathelijne R. Stoof<sup>4</sup>, Ionica  
7   Smeets<sup>1</sup>

8   <sup>1</sup> Science Communication and Society, Leiden University, the Netherlands

9   <sup>2</sup> Delft University of Technology, the Netherlands

10   <sup>3</sup> Heymans Institute for Psychological Research, University of Groningen, the  
11   Netherlands

12   <sup>4</sup> Soil Geography and Landscape Group, Wageningen University, PO box 47, 6700  
13   AA Wageningen, the Netherlands

14

15

16

17   **Abstract**

18   Communication about hydrology-induced hazards is important, in order to keep  
19   the impact of floods, droughts et cetera as low as possible. However, sometimes  
20   the boundary between specialized and non-specialized language can be vague.  
21   Therefore, a close scrutiny of the use of hydrological vocabulary by both experts  
22   and laypeople is necessary. In this study, we compare the expert and lay  
23   definitions of 12 common water-related terms and 10 water-related pictures to  
24   see where misunderstandings might arise both in text and pictures. Our primary  
25   objective is to analyze the degree of agreement between experts and laypeople in  
26   their definition of the used terms. In this way, we hope to contribute to  
27   improving the communication between these groups in the future. Our study  
28   was based on a survey completed by 34 experts and 119 laypeople.  
29   Especially concerning the definition of water-related words there are some  
30   profound differences between experts and laypeople: words like 'river' and  
31   'river basin' turn out to have a thoroughly different interpretation between the  
32   two groups. Concerning the pictures, there is much more agreement between the  
33   groups.

34

35   **1. Introduction**

36   Water related natural hazards have impacted society throughout the ages.  
37   Floods, droughts and changing river patterns all had their influence on where  
38   and how people lived. One thing that has changed throughout the last centuries,

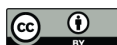

39 however, is the way these hazards are communicated to the general public. The  
40 availability of newspapers, magazines, television, radio and the internet has  
41 enabled better hydrogeocommunication as possibly contributing to a safer  
42 society.

43 In specific, communication about hydrology-induced hazards is becoming more  
44 and more important. A key aspect of increasing climate change is the expectation  
45 that water-related natural hazards, like floods and levee breaches, will occur  
46 more frequently in the future (IPCC, 2014).

47 Geoscientific studies (e.g. hydrological studies) are sometimes being ignored in  
48 policy and public action, partly because of the fact that scientists often use  
49 complicated language that is difficult to understand (Liverman, 2008). Other  
50 studies show that policy makers are more willing to take action if they  
51 understand why a situation could be hazardous (Forster and Freeborough,  
52 2006). To be effective, early warning systems for natural hazards like floods  
53 need to focus on the people exposed to risk (Basher, 2006).

54 One way to improve communication with non-experts is to avoid professional  
55 jargon (Rakedzon et al., 2017). However, sometimes the boundary between  
56 specialized and non-specialized language can be vague. Some terms are used  
57 both by experts and by laypeople, but in a slightly different way. A term like  
58 'flood' might not be considered jargon since it's quite commonly used, but could  
59 still have a different meaning in the scientific lingo than in day-to-day language.

60 In the health sciences, clear communication by doctors has been linked to better  
61 comprehension and recall by patients (Boyle, 1970; Hadlow and Pitts, 1991;  
62 Castro et al., 2007; Blackman and Sahebjalal, 2014). Similar benefits from  
63 effective communication can be expected in other scientific areas as well. An  
64 important factor is the degree to which people have the capacity to understand  
65 basic information – in the health sciences, this is referred to as health literacy  
66 (Castro et al., 2007) and in the geo-sciences as geo literacy (Stewart and Nield,  
67 2013). No studies have been done about the extent to which geoscientists use  
68 jargon in interaction with the general audience (Hut et al., 2016).

69 Therefore, a close scrutiny of hydrological vocabulary and the interpretation of  
70 common water related terms by both experts and laypeople is necessary. Health  
71 scientific studies show that a significant difference in the interpretation of  
72 specific definitions (both in text and illustration) can be found between doctors  
73 and patients (Boyle, 1970). A similar difference between experts and laymen can  
74 be expected in the communication in other scientific areas, e.g. hydrology.  
75 Experts can be unaware of using jargon, or they may overestimate the  
76 understanding of such terminology by people outside their area of expertise  
77 (Castro et al., 2007).

78 Knowledge about which terms can cause misunderstanding could help  
79 hydrogeoscientists in understanding how to get their message across to a broad

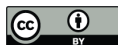

80 audience and will benefit the public.

81

82 Since there is no specific definition of jargon in hydrology, we adopt the  
83 definition from medical sciences (Castro et al., 2007) in which jargon is defined  
84 as both (1) technical terms with only one meaning listed in a technical  
85 dictionary, and (2) terms with a different meaning in lay contexts. In other  
86 words, jargon has a broader definition than some scientists think. It can be  
87 expected that hydrogeological terms sometimes have a less strict meaning for  
88 laypeople than for experts, meaning that hydrologists should be aware of the  
89 second type of jargon (Hut et al., 2016).

90 In this article, we compare the expert and lay definitions of some common water-  
91 related terms, in order to assess whether or not these terms can be considered  
92 jargon and to see where misunderstandings might arise. With this goal in mind,  
93 we developed a questionnaire to assess the understanding of common water-  
94 related words by both hydrology experts and laypeople. Our primary objective is  
95 to analyze the degree of agreement between these two groups in their definition  
96 of the used terms. In this way, we hope to contribute to improving the  
97 communication between these groups in the future.

98 To our knowledge, no study has measured the agreement in understanding of  
99 common water-related terms between hydrology experts and laypeople. A  
100 common vocabulary could increase successful (hydro)geoscientific  
101 communication.

102

## 103 2. Methodology

104

105 We started by analysing the hydrologic terms frequented in the twelve 'Water  
106 Notes' (European Commission, 2008). These Notes contain the most important  
107 information from the European Water Framework Directive (European  
108 Parliament, 2000), a European Union directive which commits European  
109 Union member states to achieve good qualitative and quantitative status of  
110 all water bodies. This was done by counting for each water related term how  
111 often it appeared in the text. We chose these Notes because they are a good  
112 representation of hydrogeocommunication: they are meant to inform laypeople  
113 about the Framework Directive. From this list, twenty of the most frequented  
114 terms were chosen (ten of these were also present in the definition list of the  
115 Framework Directive itself), such as river, river basin, lake and flood. The  
116 questionnaire (including the chosen terms) can be found in Appendix A.  
117 Although the word 'water' was the hydrological term most frequently used in the  
118 Notes, we decided to exclude this from the survey, because it is a too generic  
119 term.

120 A focus group was carried out at the American Geophysical Union fall meeting in

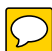

121 San Francisco in December 2016. Eight participating hydrology experts were  
122 asked to describe the above mentioned hydrologic terms on paper, and to  
123 discuss the outcomes afterwards. This discussion was audio recorded, with  
124 consent of the participants. This focus group was important because we wanted  
125 to generate reasonable answers for our survey. Ten of the terms that turned out  
126 to be too Framework Directive specific (for example: 'transit waters', which was  
127 not recognized as common hydrological lingo by the focus group participants)  
128 were left out of the survey. The ten other terms, which generated some  
129 discussion (like whether the word 'can' only relates to man-made  
130 constructions) were deemed to be fit for the survey, because they were  
131 recognized as common water-related words by the experts. Two additional, less  
132 frequented terms (discharge and water table) were also chosen, based on the  
133 focus group. The focus was only on textual terms; the ten pictorial questions (see  
134 below) were chosen by ourselves, based on water related pictures we came  
135 across in various media outlets.

### 136 Survey

137 Our survey contained 22 multiple choice questions about commonly used terms  
138 by water experts. Twelve of these were 'textual' questions: participants were  
139 asked to choose (out of 4 options) which answer described a specific hydrologic  
140 term best, in their opinion. Ten of these were pictorial questions: participants  
141 were asked to choose (out of 4 options) which photo (full colour) depicted a  
142 specific hydrologic term best, in their opinion. In addition, we asked some  
143 background questions (gender, age, level of education, postcode area + country).  
144 The complete survey can be found in appendix A.  
145 Pictures were found using the Wikimedia Commons feature. An example of both  
146 types of questions can be found in Figure 1.

147



(a) What is, in your opinion, the best definition of a dam?

- A. Barrier constructed across a valley to store water or raise the water level
- B. Barrier that prevents a river to flow into a lake
- C. Man-made, giant concrete structure to regulate water flow
- D. Man-made object to keep rivers or seas from overflowing land

(b) Which of the following photos is, in your opinion, the best depiction of a geyser?

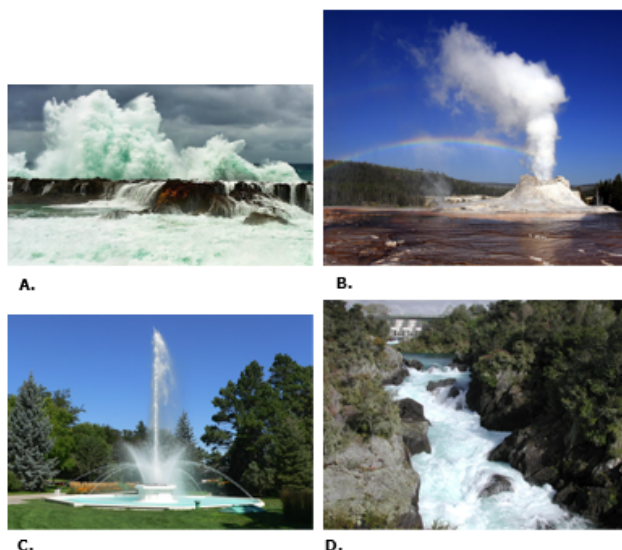

Figure 1:

Example of a textual multiple choice question (a) and a pictorial question (b) from the survey

## Participants

We developed a flyer with a link to the survey, which we handed out to experts at the international hydrology conference IAHS in South Africa in July 2017. Furthermore, the link to the survey was sent via email to hydrology experts around the globe: members of the hydrology division of the European Geosciences Union, and professional hydrologists (studying for PhD or higher) at various universities. The total number of respondents from the experts was  $n = 34$ .

The laypeople were approached in a different way. In the first week of September, 2017, one researcher went to Manchester to carry out the survey on various locations on the streets, to make sure that native English speaking laypeople would participate. Manchester was chosen because it is a large city in the UK, meaning that it would be convenient to find participants from a general population who were also native English speakers. In total, the number of laypeople that were incorporated in the study was  $n = 119$ . In the initial Google form results, the number of laypeople was  $n = 131$ , but 22 participants were

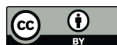

169 excluded because they didn't fill out the electronic consent or because they  
170 accidentally sent the same electronic form twice or thrice (in that case, only one  
171 of their forms was incorporated in the study).

172 The participants could fill out the survey on an iPad. If there were more  
173 participants at the same time, one would fill the survey out on the iPad and the  
174 other ones filled out an A4-sized printed full-colour hand-out. In this way,  
175 multiple participants could fill out the survey at the same time.

176 All participants, both experts and laypeople, were asked to fill out an electronic  
177 consent form stating that they were above 18 years of age and were not forced  
178 into participating. The questionnaire was of the forced-choice type: participants  
179 were instructed to guess if they did not know the answer.

180

181

## 182 Analysis

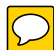

183 In order to detect interpretation differences between experts and laypeople, we  
184 wanted to analyse to what extent their answers differed from each other for each  
185 question. As pointed out before, it was not about giving the 'right' or 'wrong'  
186 answer, but about analysing the match between the resemblance between the  
187 answering patterns of the laypeople and the experts.

188

189 For each term, the hypotheses were as follows:

190

191  $H_0$ : Laypeople answer the question the same as experts;

192  $H_1$ : Laypeople answer the question differently than experts.

193

194 A statistical analysis was carried out in *R* (R Core Team, 2017), by using Bayesian  
195 contingency tables. A contingency table displays the frequency distribution of  
196 different variables, in this case a 2 by 4 table showing how often which definition  
197 of a specific term was chosen by experts and laypeople.

198 For each term, the hypothesis is tested using a so-called Bayes Factor (BF;

199 computed using Morey & Rouder, 2015). A value  $BF < 1$  is evidence towards  $H_0$ :

200 it is more likely that laypeople answer questions the same as experts than that

201 there are differences. A value  $BF > 1$  is evidence towards  $H_1$ : now, differences are

202 more likely than similarities. The BF can be interpreted as the so-called

203 likelihood-ratio: a BF-score of 2 means that  $H_1$  is twice as probable as  $H_0$ , given

204 the data.  $BF = \frac{1}{2}$  means that  $H_0$  is twice as probable as  $H_1$ . An example: aquifer

205 has  $BF = 7801$ . This means it's almost 8000 times as probable with these data

206 that there is indeed a difference between laypeople and experts in defining this



term. As the values can become very large, one often interprets their logarithm instead.

The Bayes Factors can be interpreted as follows:

- \*  $BF > 10$  : strong evidence for  $H_1$  against  $H_0$
- \*  $3 < BF < 10$  : substantial evidence for  $H_1$  against  $H_0$
- \*  $1/3 < BF < 3$  : no strong evidence for either  $H_0$  or  $H_1$
- \*  $1/10 < BF < 1/3$  : substantial evidence for  $H_0$  against  $H_1$
- \*  $BF < 1/10$  : strong evidence for  $H_0$  against  $H_1$

An additional benefit of the use of Bayes Factors is that, unlike their frequentist counterpart, no corrections for multiple testing are necessary (Bender & Lange, 1999).

In addition to a Bayes Factor for the ‘significance’ of the difference, we also calculated the misfit: the strength of the difference. The misfit was calculated by a ‘DIF’ score, in which  $DIF = 0$  means ‘perfect match’, and  $DIF = 1$  means maximum difference. This DIF-score was operationalised as

$$DIF = \sqrt{\frac{1}{2} \sum_{i=1}^4 (p_{E,i} - p_{L,i})^2}$$

where  $p_{E,i}$  is the proportion of experts choosing option  $i$ , and  $p_{L,i}$  is the proportion of laypeople making that choice. Thus, DIF is based on a sum-of-squares comparison between the answer patterns of laypeople and experts.

Subsequently, we plotted the posterior distribution of DIF, for each term. This posterior distribution indicates the likelihood for a range of DIF-scores, based on the observed data.

For example, if the answering pattern would be A: 50%, B: 50%, C: 0% and D: 0% for both the experts and the laypeople, there would be a perfect match ( $DIF = 0$ ). The misfit was plotted in graphs, ranging from the largest to the smallest misfit. The higher the misfit, and the higher the BF, the more meaningful a difference between laypeople and experts. Low values of misfit indicate agreement between laypeople and experts. The R-code and data used for the analyses is available from <https://osf.io/wk9s6/>.

### 3. Results





For the overall view of all the 22 terms (both texts and illustrations), there is extreme evidence for differences between laypeople and experts. This can be quantified by multiplying the BF's with each other, leading to a 10 log-value of 33.50 ( $H_1$  is approximately  $3 \cdot 10^{33}$  more probable than  $H_0$ ).

However, this difference is only visible when looking at the textual questions, with a combined 10 log-value of 46.14. For the pictorial questions, there is a very strong evidence for the *absence of differences*, with a negative 10 log-value - 12.63.

Interestingly enough, there was a lot of internal disagreement for both experts and laypeople on the term stream (47% agreement of experts on the most chosen answer, C: 'Small river with water moving fast enough to be visible with the naked eye', 37% agreement of laypeople on the most chosen answer, D: 'General term for any body of flowing water') and on the picture of a sewer (56% agreement of experts on answer D\*, 55% agreement of laypeople on answer D). - \* see Appendix A for the picture

Concerning the text questions, there was no internal disagreement at all between the experts on 'discharge' (100% agreement, N = 33 answered B, N = 1 answered blank) and hardly any disagreement on 'downstream' (97% agreement, N = 33 answered D).

Concerning the pictures, there was no disagreement at all between the experts on 'geyser' (100% agreement, N = 34 answered B) and on 'river' (100% agreement, N = 34 answered B). Hardly any disagreement was found on the pictures 'flood' (97% agreement, N = 33 answered C), 'hydro power' (97% agreement, N = 33 answered D). and 'reservoir' (97% agreement, N = 33 answered D). The complete table with an overview of the multiple choice answers (and the number of laypeople and experts that chose that specific answer) can be found in Table 1.

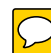

Table 1: Answer distribution for textual questions

| Term with possible definitions | Answer distribution (%) |                      |
|--------------------------------|-------------------------|----------------------|
|                                | Lay people <sup>a</sup> | Experts <sup>b</sup> |
| 1. River                       |                         |                      |



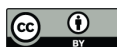

|                                                                             |    |    |
|-----------------------------------------------------------------------------|----|----|
| A. Path of fresh water flowing into the ocean                               | 71 | 9  |
| B. Water flowing only on the surface of the land and never underground      | 4  | 3  |
| C. Large stream which serves as the natural drainage for a basin            | 15 | 88 |
| D. Flow of surface water within a straight channel                          | 10 | 0  |
| <b>2. River basin</b>                                                       |    |    |
| A. Area having a common outlet for its surface runoff                       | 13 | 94 |
| B. Dry river channel which may be flooded during high water events          | 13 | 0  |
| C. Catchment which a river flows into                                       | 47 | 6  |
| D. Body of water (lake, sea, ocean) a river flows into                      | 27 | 0  |
| <b>3. Groundwater</b>                                                       |    |    |
| A. All water stored in the ground                                           | 28 | 15 |
| B. All water which is in direct contact with the ground                     | 21 | 0  |
| C. Water flowing under ground                                               | 15 | 6  |
| D. Subsurface water occupying the saturated zone                            | 36 | 79 |
| <b>4. Aquifer</b>                                                           |    |    |
| A. Subsurface water body                                                    | 11 | 24 |
| B. Groundwater that reaches the surface through a permeable rock layer      | 25 | 0  |
| C. Geological formation capable of storing, transmitting and yielding water | 47 | 76 |



|                                                                                      |    |    |
|--------------------------------------------------------------------------------------|----|----|
| D. Man-made structure first built by the Romans to transport water                   | 17 | 0  |
| <b>5. Lake</b>                                                                       |    |    |
| A. Man-made body of standing surface water of significant extent                     | 6  | 0  |
| B. Inland body of standing surface water of significant extent                       | 53 | 85 |
| C. Small body of water encompassed by high mountains                                 | 10 | 0  |
| D. Area of variable size filled with water                                           | 31 | 15 |
| <b>6. Dam</b>                                                                        |    |    |
| A. Barrier constructed across a valley to store water or raise the water level       | 47 | 62 |
| B. Barrier that prevents a river to flow into a lake                                 | 9  | 3  |
| C. Man-made, giant concrete structure to regulate water flow                         | 33 | 15 |
| D. Man-made object to keep rivers or seas from overflowing land                      | 11 | 20 |
| <b>7. Delta</b>                                                                      |    |    |
| A. Feature resulting from an alluvial deposit at a rivermouth                        | 25 | 61 |
| B. River mouth that spreads out a little bit, like the shape of a Greek letter Delta | 35 | 15 |
| C. Triangular shaped island in a river                                               | 12 | 0  |
| D. Landform that forms from deposition of sediment carried by a river                | 28 | 24 |
| <b>8. Downstream</b>                                                                 |    |    |
| A. Heavy intensity rain water falling down                                           | 12 | 0  |



|                                                                               |    |     |
|-------------------------------------------------------------------------------|----|-----|
| B. Direction from which a fluid is moving                                     | 26 | 3   |
| C. Stream that branches off from the main stream                              | 4  | 0   |
| D. Direction in which a fluid is moving                                       | 58 | 97  |
| <b>9. Flood</b>                                                               |    |     |
| A. Large wave of moving water                                                 | 2  | 0   |
| B. Overflow of water onto lands that are not normally covered by water        | 88 | 76  |
| C. Rise in the water level to a peak from which it recedes at a slower rate   | 5  | 18  |
| D. Unusually large run-off event that leads to economic damage                | 5  | 6   |
| <b>10. Stream</b>                                                             |    |     |
| A. River that drains into another river and not into a lake, sea or ocean     | 11 | 3   |
| B. Watercourse that flows into a larger watercourse or into a lake            | 34 | 24  |
| C. Small river with water moving fast enough to be visible with the naked eye | 37 | 26  |
| D. General term for any body of flowing water                                 | 18 | 47  |
| <b>11. Discharge</b>                                                          |    |     |
| A. Volume of water that passes through the whole river in one day             | 29 | 0   |
| B. Volume of water flowing through a river cross-section per unit time        | 45 | 100 |
| C. Water with enough sediment in it to limit visibility to less than 1 feet   | 13 | 0   |



|                                                              |           |           |
|--------------------------------------------------------------|-----------|-----------|
| D. Flowing water in a reservoir used to generate electricity | 13        | 0         |
| <b>12. Water table</b>                                       |           |           |
| A. Top surface of the zone of saturation                     | <b>56</b> | <b>82</b> |
| B. Saturated part of an aquifer                              | 15        | 3         |
| C. Tide table kept at water authority                        | 16        | 0         |
| D. Height to which water raises in a well                    | 13        | 15        |

275 <sup>a</sup> The number of lay respondents varied from 115 to 119: N=115 for aquifer, water table; N=116  
 276 for lake, delta; N=117 for stream; N=118 for river basin, groundwater, dam, downstream, flood,  
 277 discharge; N=119 for river. <sup>b</sup> The number of experts respondents was N=33 for delta and  
 278 discharge and N=34 for all other terms.

279

280 *Figure 2: Answer distribution of pictorial questions<sup>a</sup>*

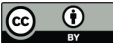

2

|           |                                                                                       |                                                                                       |                                                                                       |                                                                                       |                                                                                      |                               |          |           |          |
|-----------|---------------------------------------------------------------------------------------|---------------------------------------------------------------------------------------|---------------------------------------------------------------------------------------|---------------------------------------------------------------------------------------|--------------------------------------------------------------------------------------|-------------------------------|----------|-----------|----------|
| 1. Geyser |    |    |    |    |    | 6. Hydro power                |          |           |          |
|           | Lay people (%)<br>Experts (%)                                                         | 4<br>0                                                                                | 91<br>100                                                                             | 2<br>0                                                                                | 3<br>0                                                                               | Lay people (%)<br>Experts (%) | 0<br>0   | 5<br>0    | 29<br>3  |
| 2. Sewer  |    |    |    |    |    | 7. Reservoir                  |          |           |          |
|           | Lay people (%)<br>Experts (%)                                                         | 35<br>29                                                                              | 3<br>0                                                                                | 7<br>15                                                                               | 4<br>3                                                                               | Lay people (%)<br>Experts (%) | 4<br>3   | 5<br>0    | 17<br>0  |
| 3. Flood  |    |    |    |    |    | 8. Dike                       |          |           |          |
|           | Lay people (%)<br>Experts (%)                                                         | 0<br>1                                                                                | 0<br>0                                                                                | 87<br>97                                                                              | 12<br>3                                                                              | Lay people (%)<br>Experts (%) | 47<br>68 | 13<br>9   | 16<br>14 |
| 4. Pond   |   |   |   |   |   | 9. River                      |          |           |          |
|           | Lay people (%)<br>Experts (%)                                                         | 1<br>0                                                                                | 7<br>12                                                                               | 2<br>3                                                                                | 2<br>0                                                                               | Lay people (%)<br>Experts (%) | 2<br>0   | 85<br>100 | 12<br>0  |
| 5. Swamp  |  |  |  |  |  | 10. Dew                       |          |           |          |
|           | Lay people (%)<br>Experts (%)                                                         | 9<br>3                                                                                | 23<br>32                                                                              | 61<br>62                                                                              | 7<br>3                                                                               | Lay people (%)<br>Experts (%) | 77<br>91 | 17<br>9   | 2<br>0   |

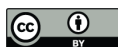

282 <sup>a</sup> The number of lay respondents was 115 to 117: N=115 for hydro power, reservoir; N=116 for  
283 geyser, pond, swamp, dike, dew; N=117 for sewer, flood, river. <sup>b</sup>The number of expert  
284 respondents was N=34 for all terms.

286

### 287 3.1 Misfits between laypeople and experts

288 The biggest misfit between laypeople and experts was found in the textual  
289 questions, for subsequently river basin (log-10 BF 14.9), river (log-10 BF 11.9),  
290 discharge (log-10 BF 6.2), aquifer (log-10 BF 3.9) and groundwater (log-10 3.4)  
291 (for more BF-values, see table in appendix B).

292  
293 For these words, we have clear proof that there is disagreement between experts  
294 and laypeople on the interpretation. This can be seen in Figure 3. The pictorial  
295 questions are marked with an asterisk. None of these pictorial questions made it  
296 to the 'top 10' of biggest misfits. The pictorial questions that lead to the biggest  
297 misfits were subsequently hydro power, reservoir, dike, sewer and swamp.

298  
299 *Figure 3: Graph showing the posterior distribution of the misfit between laypeople*  
300 *and experts.*

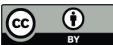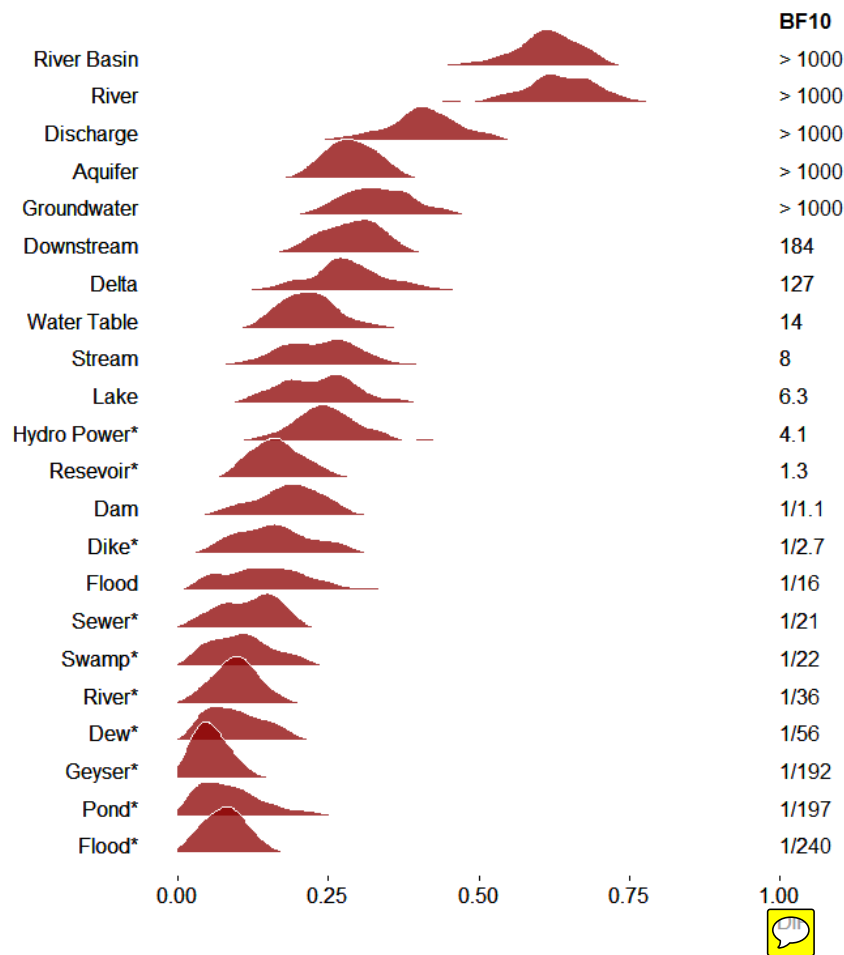

301  
302

303 The broader and flatter the distribution, the stronger the Bayes Factor. If both  
304 experts and laypeople have a high internal agreement (above 90%) the misfit is  
305 smaller than if there's a lot of internal disagreement.  
306 This can be seen in the graph: the posterior distribution of the 'misfit' parameter  
307 is visible. It is important to note that under  $H_0$ , the misfit is not exactly equal to 0,  
308 because there is a certain degree of 'randomness'. In other words: the misfit  
309 describes to what extent the answering patterns of the laypeople and the experts  
310 are similar to each other.

311 **4. Discussion and conclusion**

312 In total, we collected 119 questionnaires from native English-speaking laypeople  
313 and 34 questionnaires from (not necessarily native English-speaking) experts.  
314 15 of the experts were native English/American speakers (2 others came from  
315 South Africa, where English is also a major language, 2 others didn't fill this





question out and the rest of the experts came from the Netherlands, Belgium, Germany, Turkey, Switzerland, Luxembourg, Brazil, France and Italy. All experts were of PhD level or above and were thus considered to have enough knowledge of the English scientific language. Nevertheless, two participants wrote in the comments that they found some of the terms difficult to understand due to the fact that they were non-native English-speakers.

This could be a limitation to our study, because possibly the non-native English-speaking experts would have answered differently if they had been native

English-speaking experts. However, since the majority of the experts (n=32) didn't have trouble understanding the questions (or at least did not write a comment about this), we don't consider this a major limitation.

Our definition from jargon is adopted from a study by Castro et al. (2007), in which it is described as both (1) technical terms with only one meaning listed in a technical dictionary, and (2) terms with a different meaning in lay contexts. Therefore, this definition is not influenced by a distinction between native and non-native English-speakers. However, it can be expected that hydrogeological terms sometimes have a less strict meaning for non-native English speakers in general, and especially for non-native English speaking lay people, due to the difference in understanding between laypeople and experts (Hut et al., 2016). This is why we excluded non-native English-speaking laypeople.

A disadvantage of the survey was that some of the text questions were still quite ambiguous. The interpretation of some terms changes depending on the context and the specific background. Due to the limitations of a multiple choice format, in some cases none of the definitions might seem to have a perfect fit, whereas with the pictures it is the other way around and sometimes more than one picture could fit a generic term. Giving only 4 predefined options could seem a bit leading and restricted. Moreover, non-native speaking experts could be confused by some of the English definitions.

Concerning the surveys of the laypeople, a disadvantage of the hand-outs was the fact that the pictures could not be enlarged. In addition, the prints were two-sided, and in some cases participants overlooked some of the questions. Even though the survey was of the forced type, not all people did answer all the questions.

The answering pattern within a group (laypeople or experts) could be inherent to the specific answers. In some cases, the answers were quite similar to each other, in other cases, the difference was quite big. However, this could not explain the misfit between laypeople and experts, since they both filled out the same survey.

Of course, this research is only a first step in investigating the possibilities of a common vocabulary. By introducing our method to the scientific community (and making it accessible via open access) we hope to encourage other scientists to carry out this survey with other terminology as well.

Since relatively little is known about the interpretation of jargon by laypeople

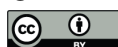

359 and experts (especially in the natural sciences), additional research in this field  
360 is recommended.

361 Concluding, this study shows that there exists a strong difference in the  
362 interpretation of common hydrological terms between laypeople and experts.  
363 This difference is only present when the terms are presented in a textual way.  
364 When they are presented in a visual way, we have shown that the answer  
365 patterns by laypeople and experts are the same.

366 Therefore, the most important finding of this study is that pictures are more  
367 clear than words when it comes to science communication. We strongly  
368 recommend to use relevant pictures whenever possible when communicating  
369 about scientific topics to laypeople.

370 Our findings differ from medical jargon studies which take into account both  
371 textual terms and illustrations. For example, Boyle (1970) finds that there is a  
372 significant difference between doctors and patients when it comes to the  
373 interpretation of both terms and illustrations. However, these illustrations  
374 differed in various ways from the pictures in our study: they were hand drawn,  
375 and only meant to indicate the exact position of a specific bodily organ.

376 What makes a 'good' picture for science communication purposes would be an  
377 interesting topic for further research. Also, more research could be done on the  
378 textual terms: how could the existing interpretation gap between experts and  
379 laypeople be diminished? What impact would the combination of pictures and  
380 textual terms have - would the text enhance the pictures and vice versa? All in all,  
381 a broader research which incorporates more terminology and pictures (from  
382 various scientific disciplines) would be a very valuable starting point. Also, in  
383 line with Hut et al. (2016), it would be interesting to analyse the understanding  
384 of motion pictures (e.g. documentaries) in geoscience communication, while TV  
385 is a powerful medium.

386

## 387 6. Acknowledgements

388 Our special thanks goes to dr. Sam Kingworth, senior lecturer in Science  
389 Communication at Manchester Metropolitan University, for contributing to this  
390 project in various ways: from thinking along about the questionnaire to helping  
391 out with the logistics while carrying out the survey in Manchester.

392 Also, we would like to express our thanks to all the participants in the survey and  
393 to the members of the AGU focus group.

394

## 395 References

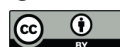

- 396 Liverman, D. G., E. (2008) Environmental geoscience - communication  
397 challenges. Geological Society, London, Special Publications, 305, 197-209, 30  
398 October, <https://doi.org/10.1144/SP305.17>
- 399 Forster, A. & Freeborough, K. (2006) A guide to the communication of  
400 geohazards information to the public, British Geological Survey, Nottingham,  
401 Urban Geoscience and Geohazards Programme, Internal Report IR/06/009  
402
- 403 Basher, R (2006) Global early warning systems for natural hazards: systematic  
404 and people-centred. Phil. Trans. R. Soc. A (2006) 364, 2167–2182  
405 doi:10.1098/rsta.2006.1819
- 406 Bender, R. & Lange, S. (1999). Adjusting for multiple testing-when and how?  
407 Journal of Clinical Epidemiology, 54(4), 343-349, DOI:10.1016/S0895-  
408 4356(00)00314-0  
409
- 410 Blackman, J. & Sahebjalal, M. (2014). Patient understanding of frequently used  
411 cardiology terminology. British Journal of Cardiology. 21. 10.5837/bjc.2014.007.  
412
- 413 Boyle, C.M. (1970) Difference Between Patients' and Doctors' Interpretation of  
414 Some Common Medical Terms. Br Med J. 2(5704): 286–289.
- 415 Castro CM1, Wilson C, Wang F, Schillinger D. (2007) Babel babble: physicians'  
416 use of unclarified medical jargon with patients. Am J Health Behav. Sep-Oct;31  
417 Suppl 1:S85-95. DOI:10.5555/ajhb.2007.31.suppl.S85
- 418 Hadlow, J. and Pitts M. (1991). The understanding of common health terms by  
419 doctors, nurses and patients. Soc Sci Med. 1991;32(2):193-6.  
420
- 421 Hut R., Land-Zandstra A.M., Smeets I., Stoof C.R. (2016). Geoscience on television:  
422 a review of science communication literature in the context of geosciences.  
423 Hydrol. Earth Syst. Sci., 20, 2507–2518, doi:10.5194/hess-20-2507-2016  
424
- 425 IPCC, 2014: Climate Change 2014: Synthesis Report. Contribution of Working  
426 Groups I, II and III to the Fifth Assessment Report of the Intergovernmental  
427 Panel on Climate Change [Core Writing Team, R.K. Pachauri and L.A. Meyer  
428 (eds.)]. IPCC, Geneva, Switzerland, 151 pp.
- 429 Jeffreys H. (1961). Theory of probability. Oxford, UK: Oxford University Press
- 430 Morey R. D. and Rouder J. N. (2015). BayesFactor: Computation of Bayes Factors  
431 for Common Designs. <https://CRAN.R-project.org/package=BayesFactor>



432 R Core Team (2017). R: A language and environment for statistical computing. R  
433 Foundation for Statistical Computing, Vienna, Austria. [https://www.R-](https://www.R-project.org/)  
434 [project.org/](https://www.R-project.org/)

435 Rakedzon T, Segev E, Chapnik N, Yosef R, Baram-Tsabari A (2017) Automatic  
436 jargon identifier for scientists engaging with the public and science  
437 communication educators. PLoS ONE12(8): e0181742.  
438 <https://doi.org/10.1371/journal.pone.0181742>  
439

440 Stewart I.S. and Nield T. (2013) Earth stories: context and narrative in the  
441 communication of popular geoscience. Proceedings of the Geologists'  
442 Association. Volume 124, Issue 4, June 2013, Pages 699-712.  
443 <https://doi.org/10.1016/j.pgeola.2012.08.008>

444 European Water Framework Directive:  
445 [http://ec.europa.eu/environment/water/water-framework/index\\_en.html](http://ec.europa.eu/environment/water/water-framework/index_en.html)

446 USGS Glossary:  
447 <https://water.usgs.gov/edu/dictionary.html>

448 Water Notes:  
449 [http://ec.europa.eu/environment/water/participation/notes\\_en.htm](http://ec.europa.eu/environment/water/participation/notes_en.htm)

450 WMO Glossary:  
451 [http://www.wmo.int/pages/prog/hwrrp/publications/international\\_glossary/3](http://www.wmo.int/pages/prog/hwrrp/publications/international_glossary/385_IGH_2012.pdf)  
452 [85\\_IGH\\_2012.pdf](http://www.wmo.int/pages/prog/hwrrp/publications/international_glossary/385_IGH_2012.pdf)  
453



454 **Appendix A: questionnaire**

455

## Questionnaire hydrological terms

Thank you for participating in this survey! We will ask you some questions about water and terminology. We are not looking for a 'right' answer, but for the answer that is, in your opinion, the best definition.

It will take approx. 5 minutes to participate. Have fun!

### 1. What is, in your opinion, the best definition of a river?

- ☐ A: Path of fresh water flowing into the ocean
- ☐ B: Water flowing only on the surface of the land and never underground
- ☐ C: Large stream which serves as the natural drainage for a basin
- ☐ D: Flow of surface water within a straight channel

### 2. What is, in your opinion, the best definition of a river basin?

- ☐ A: Area having a common outlet for its surface runoff
- ☐ B: Dry river channel which may be flooded during high water events
- ☐ C: Catchment which a river flows into
- ☐ D: Body of water (lake, sea, ocean) a river flows into

456



**3. What is, in your opinion, the best definition of groundwater?**

- ☐ A: All water stored in the ground
- ☐ B: All water which is in direct contact with the ground
- ☐ C: Water flowing under ground
- ☐ D: Subsurface water occupying the saturated zone

**4. What is, in your opinion, the best definition of an aquifer?**

- ☐ A: Subsurface water body
- ☐ B: Groundwater that reaches the surface through a permeable rock layer
- ☐ C: Geological formation capable of storing, transmitting and yielding water
- ☐ D: Man-made structure first built by the Romans to transport water

457

**5. What is, in your opinion, the best definition of a lake?**

- ☐ A: Man-made body of standing surface water of significant extent
- ☐ B: Inland body of standing surface water of significant extent
- ☐ C: Small body of water encompassed by high mountains
- ☐ D: Area of variable size filled with water

458



**6. What is, in your opinion, the best definition of a dam?**

- ☐ A: Barrier constructed across a valley to store water or raise the water level
- ☐ B: Barrier that prevents a river to flow into a lake
- ☐ C: Man-made, giant concrete structure to regulate water flow
- ☐ D: Man-made object to keep rivers or seas from overflowing land

**7. What is, in your opinion, the best definition of a delta?**

- ☐ A: Feature resulting from an alluvial deposit at a rivermouth
- ☐ B: River mouth that spreads out a little bit, like the shape of a Greek letter Delta
- ☐ C: Triangular shaped island in a river
- ☐ D: Landform that forms from deposition of sediment carried by a river

**8. What is, in your opinion, the best definition of downstream?**

- ☐ A: Heavy intensity rain water falling down
- ☐ B: Direction from which a fluid is moving
- ☐ C: Stream that branches off from the main stream
- ☐ D: Direction in which a fluid is moving

**9. What is, in your opinion, the best definition of a flood?**

- ☐ A: Large wave of moving water
- ☐ B: Overflow of water onto lands that are not normally covered by water
- ☐ C: Rise in the water level to a peak from which it recedes at a slower rate
- ☐ D: Unusually large run-off event that leads to economic damage

459  
460





**10. What is, in your opinion, the best definition of a stream?**

- ☐ A: River that drains into another river and not into a lake, sea or ocean
- ☐ B: Watercourse that flows into a larger watercourse or into a lake
- ☐ C: Small river with water moving fast enough to be visible with the naked eye
- ☐ D: General term for any body of flowing water

**11. What is, in your opinion, the best definition of discharge?**

- ☐ A: Volume of water that passes through the whole river in one day
- ☐ B: Volume of water flowing through a river cross-section per unit time
- ☐ C: Water with enough sediment in it to limit visibility to less than 1 feet
- ☐ D: Flowing water in a reservoir used to generate electricity

**12. What is, in your opinion, the best definition of a water table?**

- ☐ A: Top surface of the zone of saturation
- ☐ B: Saturated part of an aquifer
- ☐ C: Tide table kept at water authority
- ☐ D: Height to which water raises in a well



13. Which of the following photos is, in your opinion, the best depiction of a geyser?

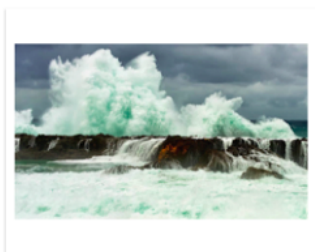

☐ A:

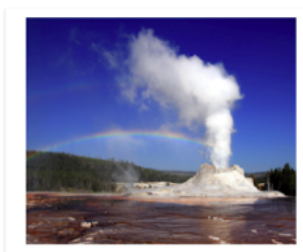

☐ B:

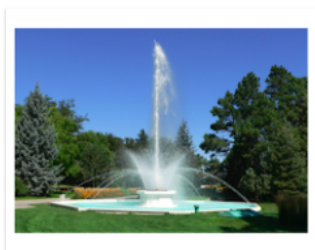

☐ C:

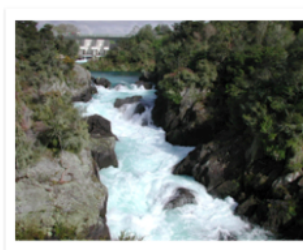

☐ D:

462

14. Which of the following photos is, in your opinion, the best depiction of a sewer?

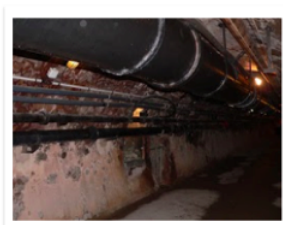

☐ A:

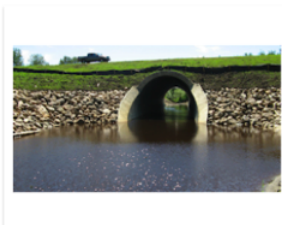

☐ B:

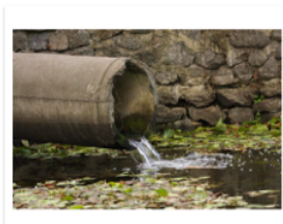

☐ C:

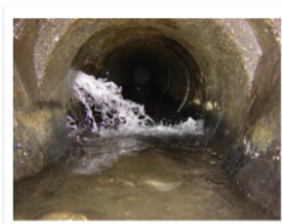

☐ D:

463



15. Which of the following photos is, in your opinion, the best depiction of a flood?

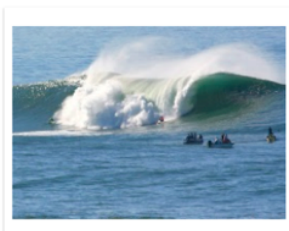

☐ A:

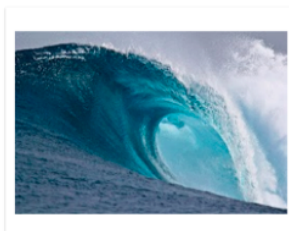

☐ B:

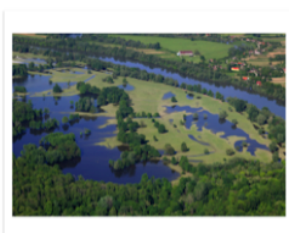

☐ C:

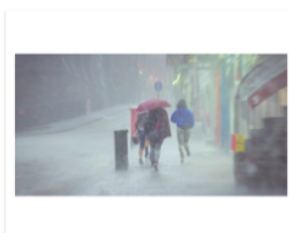

☐ D:

464

16. Which of the following photos is, in your opinion, the best depiction of a pond?

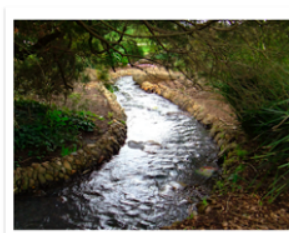

☐ A:

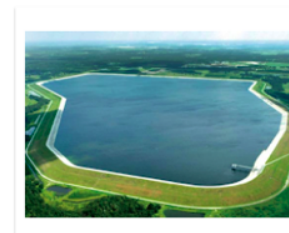

☐ B:

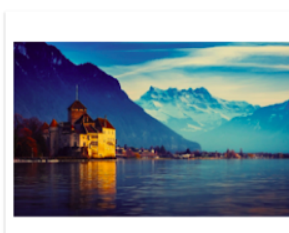

☐ C:

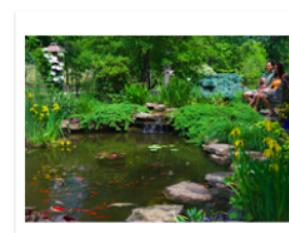

☐ D:

465



17. Which of the following photos is, in your opinion, the best depiction of a swamp?

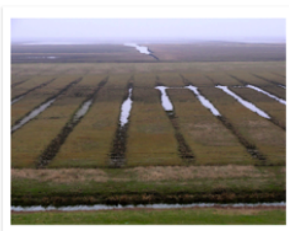

☐ A:

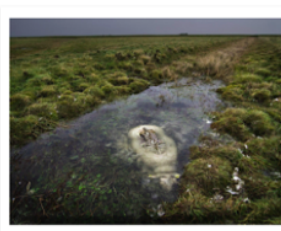

☐ B:

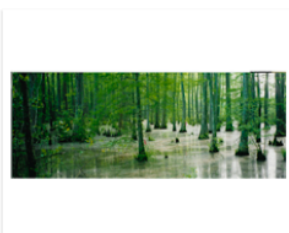

☐ C:

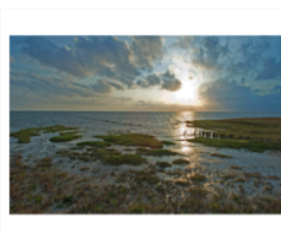

☐ D:

466

18. Which of the following photos is, in your opinion, the best depiction of hydro power?

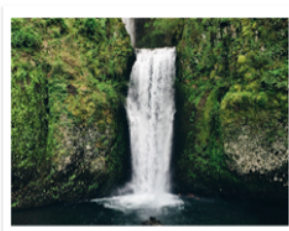

☐ A:

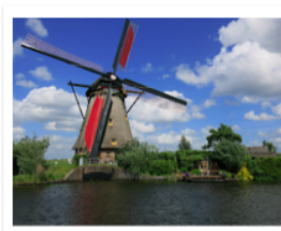

☐ B:

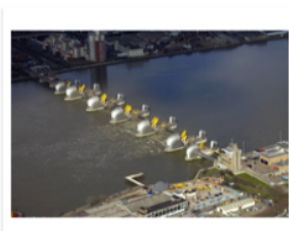

☐ C:

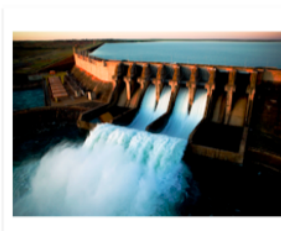

☐ D:

467



19. Which of the following photos is, in your opinion, the best depiction of a reservoir?

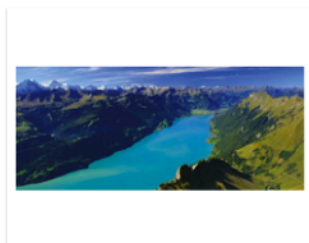

☐ A:

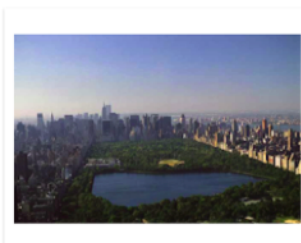

☐ B:

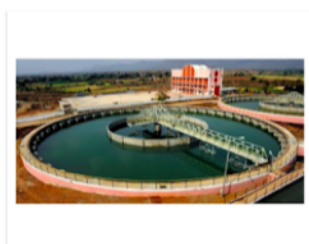

☐ C:

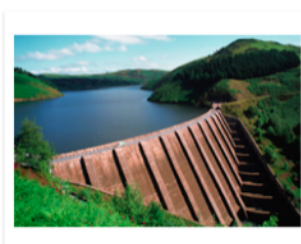

☐ D:

468

20. Which of the following photos is, in your opinion, the best depiction of a dike?

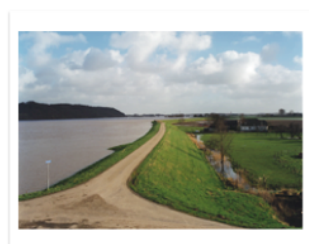

☐ A:

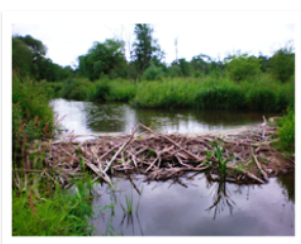

☐ B:

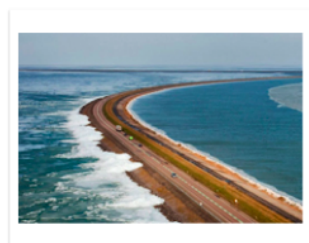

☐ C:

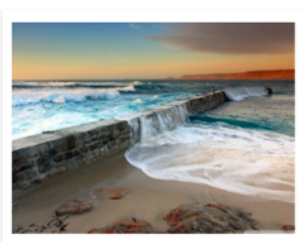

☐ D:

469





21. Which of the following photos is, in your opinion, the best depiction of a river?

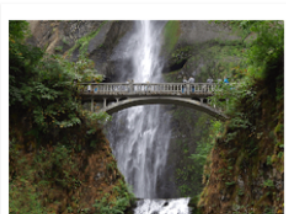

☐ A:

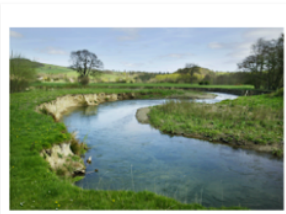

☐ B:

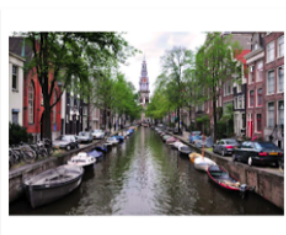

☐ C:

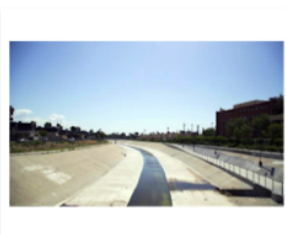

☐ D:

470

22. Which of the following photos is, in your opinion, the best depiction of dew?

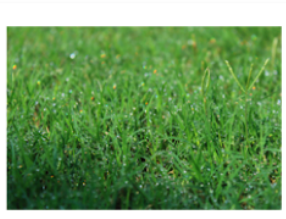

☐ A:

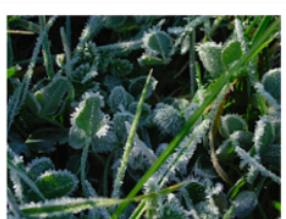

☐ B:

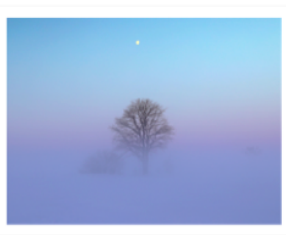

☐ C:

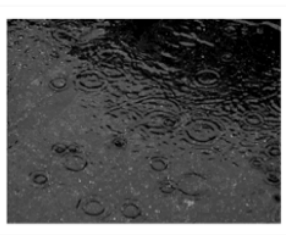

☐ D:

471



23. Do you have any comments concerning the questions?

Your answer

24. What is your gender?

- ☐ Female  
☐ Male  
☐ Other or prefer not to say

25. What is your age?

Your answer

26. What is your country and postcode area?

Your answer

27. What is your highest completed education level?

Your answer

472  
 473

## 474 **Appendix B**

475

476 Table 2: Bayes Factors (BF) and their base-10 logarithms.

477

| Term        | BF        | Log 10 BF |
|-------------|-----------|-----------|
| Aquifer     | 7.801e+03 | 3.892     |
| River basin | 7.428e+14 | 14.871    |
| Dam         | 8.783e-01 | -0.056    |
| Delta       | 1.273e+02 | 2.105     |
| Dew         | 1.798e-02 | -1.745    |
| Dike        | 3.685e-01 | -0.434    |
| Discharge   | 1.531e+06 | 6.185     |
| Downstream  | 1.841e+02 | 2.265     |





|                 |           |         |
|-----------------|-----------|---------|
|                 |           |         |
| Flood (text)    | 4.165e-03 | -2.380  |
| Flood (picture) | 6.403e-02 | -1.194  |
| Geyser          | 5.209e-03 | -2.283  |
| Groundwater     | 2.418e+03 | 3.383   |
| Hydro power     | 4.070e+00 | 0.610   |
| Lake            | 6.324e+00 | 0.801   |
| Pond            | 5.069e-03 | -2.295  |
| Reservoir       | 1.274e+00 | 0.105   |
| River (text)    | 2.784e-02 | -1.555  |
| River (picture) | 7.094e+11 | 11.851  |
| Sewer           | 4.790e-02 | -1.3197 |
| Stream          | 8.046e+00 | 0.906   |
| Swamp           | 4.601e-02 | -1.337  |
| Water table     | 1.360e+01 | 1.134   |

478

479

480

481
